# Supplementary material
Source: PubMed Central journal article supplement (PMC8126605)
Supplement: mmc1.pdf [file mmc1.pdf]

**Cell Stem Cell, Volume 28**

**Supplemental Information**

**SARS-CoV-2 infects human adult donor eyes  
and hESC-derived ocular epithelium**

**Anne Z. Eriksen, Rasmus Møller, Bar Makovoz, Skyler A. Uhl, Benjamin R.  
tenOever, and Timothy A. Blenkinsop**

1 Supplemental Material

2 Supplemental Figure 1

Donor A Isotype controls

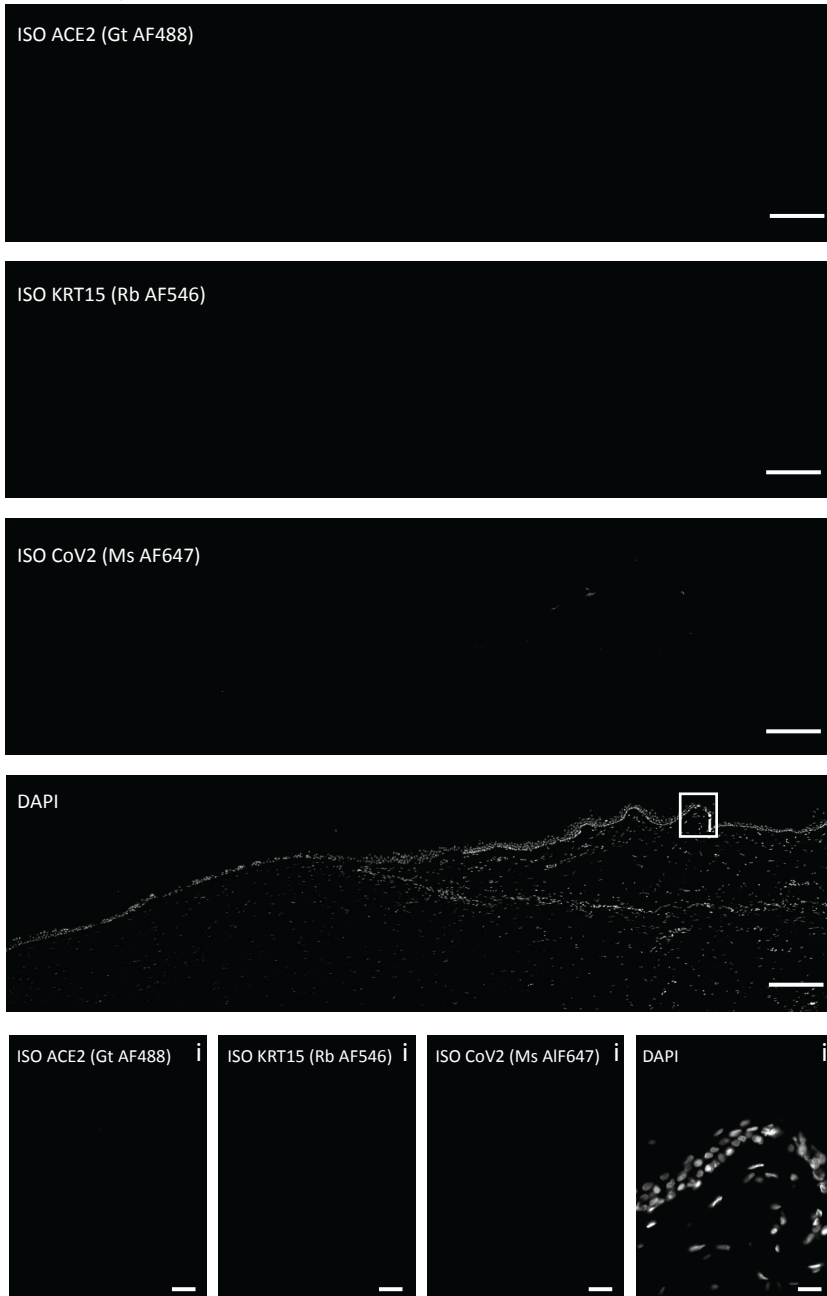

3

4 **Figure S1. Isotype controls for images in Figure 1, corneal tissue from post-mortem donor who**

5 **tested positive for SARA-CoV-2.** Isotype controls for images of post-mortem human

6 cornea/limbal/scleral tissue section found in Figure 1. Isotypes were obtained by staining with Alexa

7 fluor (AF) conjugated IgG antibodies. Image 1-4 from the top represent stitched tile-scans, scale bar =

8 200 $\mu$ m. Bottom row of images show single tiles, scale bar = 20 $\mu$ m.

9

0 Supplemental Figure 2

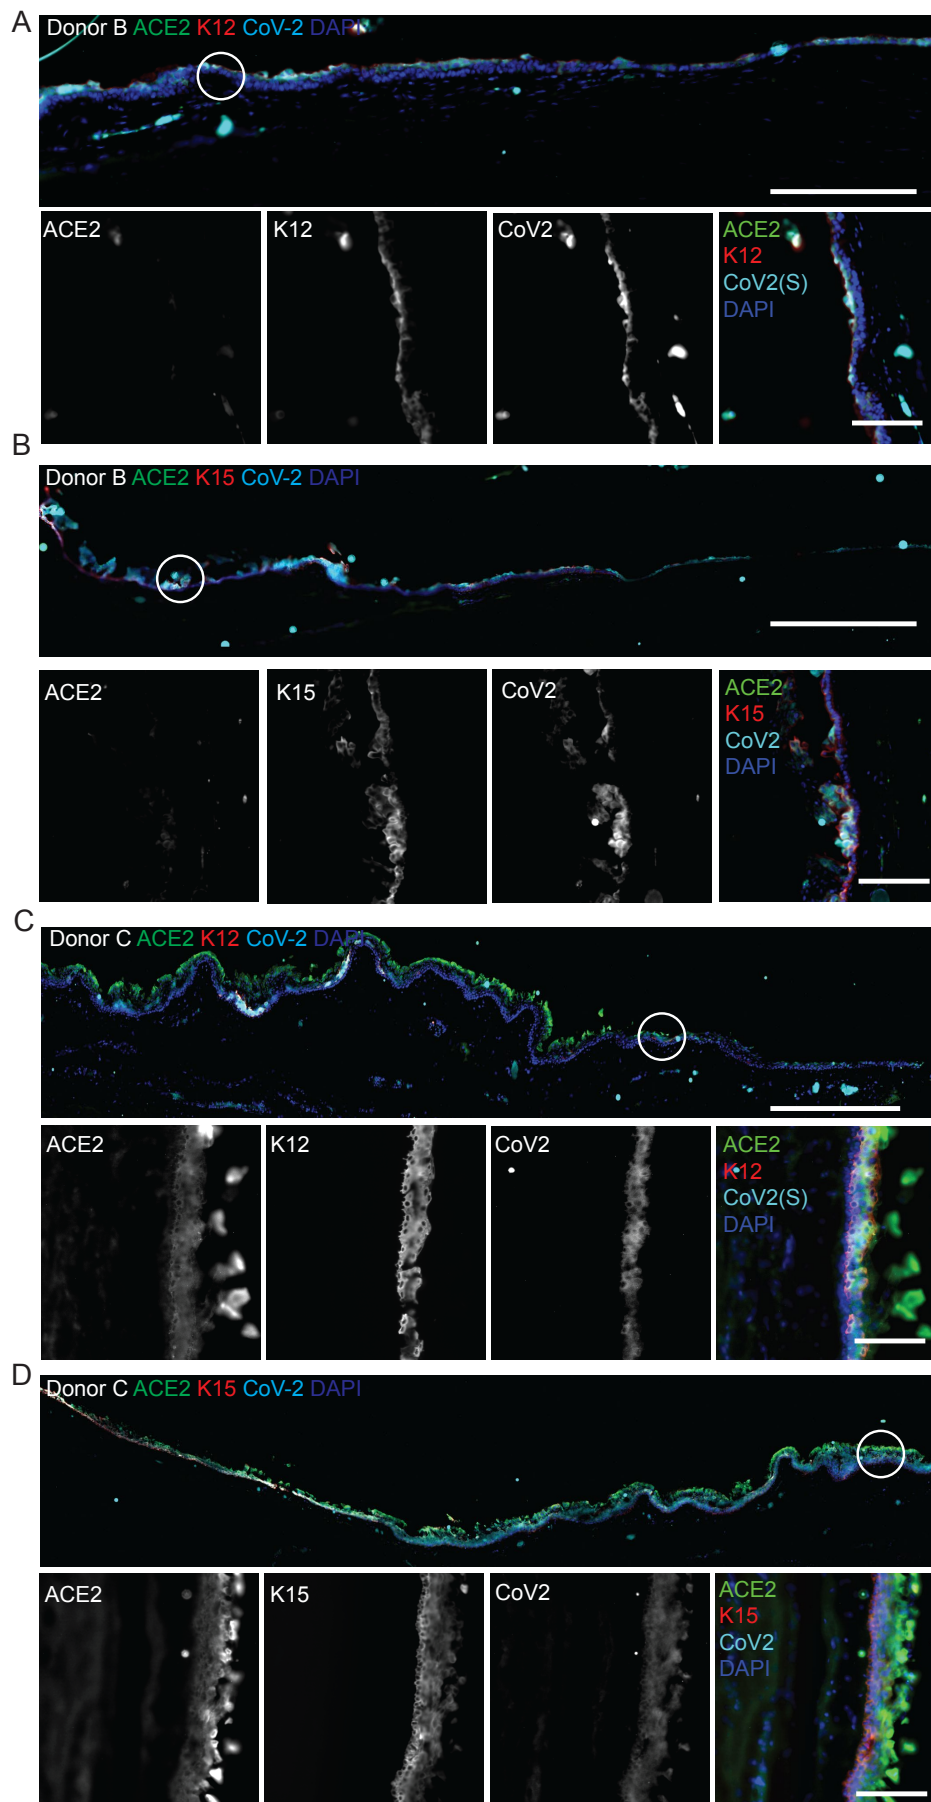

2 **Figure S2. Immunofluorescence of post-mortem eye tissue from donors tested positive for SARS-**  
3 **CoV-2, related to Figure 1.** A) Co-staining of SARS-CoV-2 (CoV-2) with cornea marker keratin 12, and  
4 ACE2, from donor one out of three, scale bar =200µm. White circle indicates region of zooms, scale bar in  
5 zooms = 50µm. Isotype controls in Figure S4A B) Co-staining of SARS-CoV-2 (CoV-2) with limbus marker  
6 keratin 15, and ACE2, from donor one out of three, scale bar =200µm. White circle indicates region of  
7 zooms, scale bar in zooms = 50µm. Isotype controls in Figure S4B C) Co-staining of SARS-CoV-2 (CoV-2)  
8 with cornea marker keratin 12, and ACE2, in two of the donors, scale bar =200µm. White circle indicates  
9 region of zooms, scale bar in zooms = 50µm. Isotype controls in Figure S4A. D) Co-staining of SARS-CoV-2  
0 (CoV-2) with limbus marker keratin 15, and ACE2, from donor two out of three, scale bar =200µm. White  
1 circle indicates region of zooms, scale bar in zooms = 50µm. Isotype controls in Figure S4B.  
2

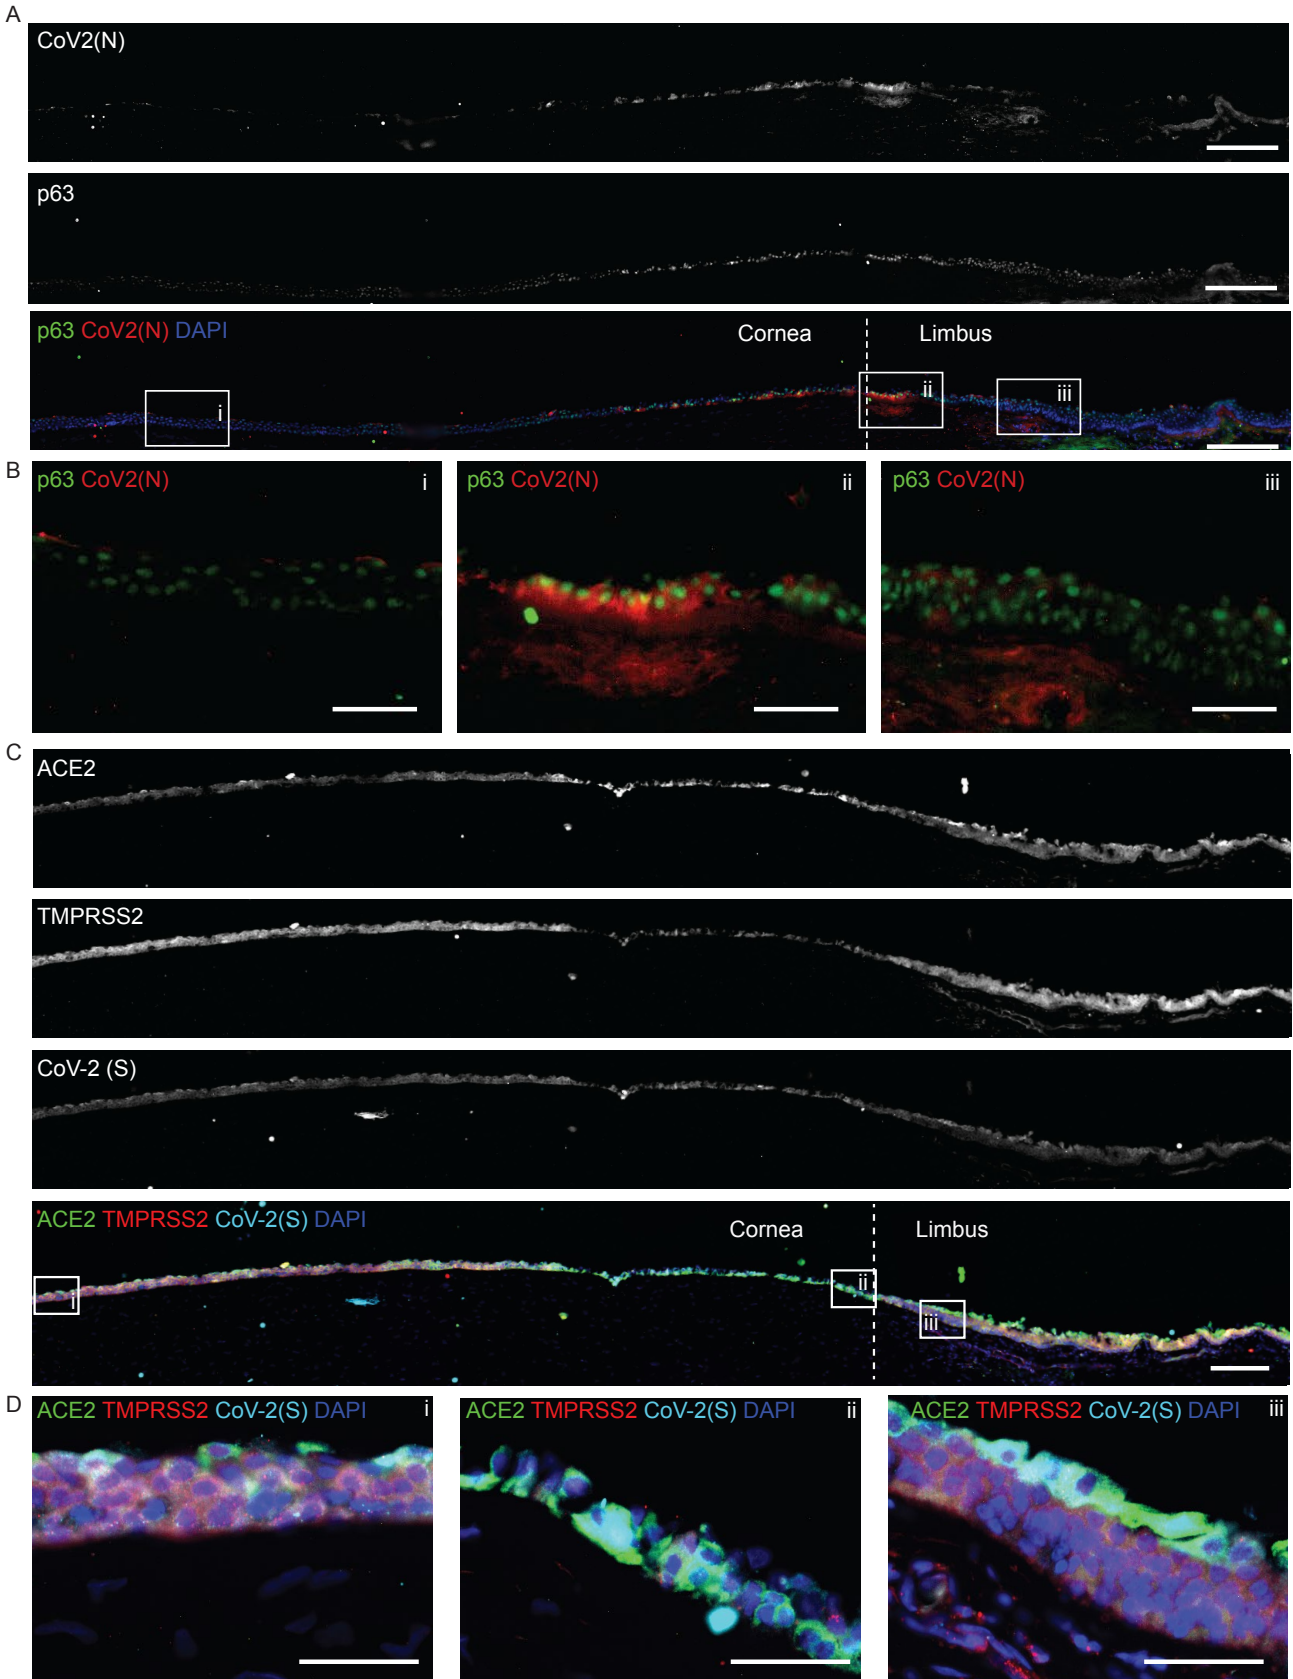

6 **Figure S3. Immunofluorescence of post-mortem eye tissue from donors who tested positive for**  
7 **SARS-CoV-2, stained positive for p63 and SARS-CoV2 and Co-expression of ACE2 and TMPRSS2,**  
8 **related to Figure 1 .** A) Tile scan of cornea-limbal region of eye from donor A, From top: Rb-anti-SARS-  
9 CoV2 N-capsid (CoV2 (N)), Ms-anti-p63, overlay showing CoV2(N) in red, p63 in green and DAPI in blue.  
0 Scale bare = 200µm. ISO-type controls in Figure S4B B) Magnified images from interest regions of the  
1 cornea stained for CoV2 (N) and p36, i = central cornea, ii and iii = limbus region. Scale bar = 50µm. C)  
2 Tile scan of cornea-limbal region of eye from donor A, From top: Gt-anti-ACE2, Rb-anti-TMPRSS2, Ms-  
3 anti-SARS-CoV2-spike (CoV2(S)), overlay showing ACE2 in green, TMPRSS2 in red, CoV2(S) in cyan, DAPI  
4 in blue. Scale bare = 200µm. ISO-type controls in Figure S4C D) Magnified images from interest regions of  
5 the cornea stained with ACE2, TMPRSS2 and CoV2(S), i and ii = central cornea, iii = limbus region. Scale  
6 bar = 50µm.

7

8

9  
0 Supplemental Figure 4

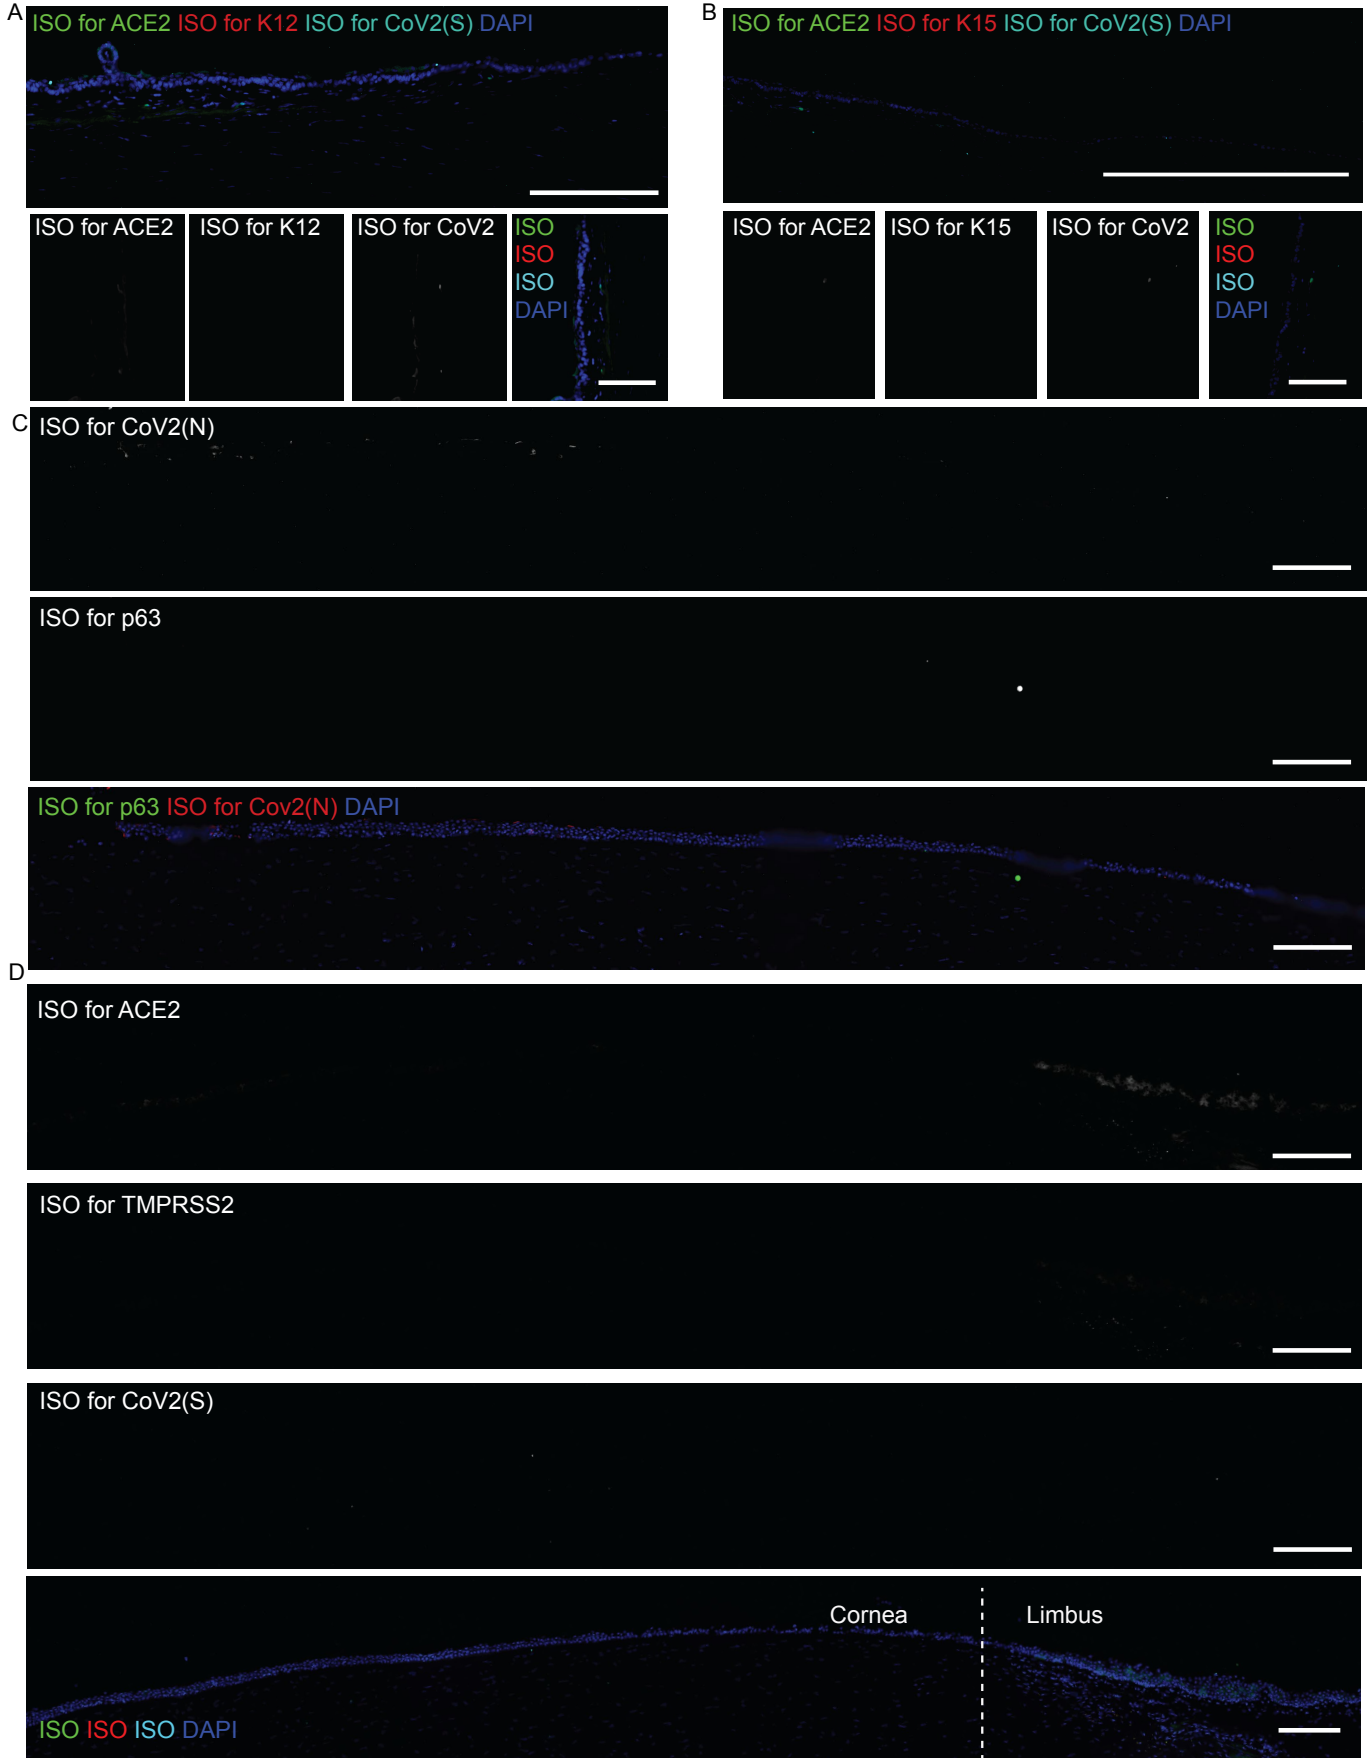

2 **Figure S4. Isotype controls from images of postmortem corneas, related to Figure 1.** A) Isotype  
3 controls for tile scans and magnified images in Figure S2 A and C, Isotype obtained by staining directly  
4 with secondary antibodies conjugated to Alexa fluor. Gt-Alexa fluor 488 (ISO ACE2(green)), Rb-Alexa  
5 fluor 546 (ISO for K12 (red)) and Ms-Alexa fluor 647(ISO for CoV2 (Cyan)), DAPI is shown in blue. Scale  
6 bar in tile scan (top) = 200µm, scale bar in magnified images (bottom) = 50µm. B) Isotype controls for tile  
7 scans and magnified images in Figure S2 B and D Isotype obtained by staining directly with secondary  
8 antibodies conjugated to Alexa fluor. Gt-Alexa Fluor 488 (ISO ACE2(green)), Rb-Alexa fluor 546 (ISO for  
9 K15 (red)) and Ms-Alexa fluor 647(ISO for CoV2 (Cyan)), DAPI is shown in blue. Scale bar in tile scan  
0 (top) = 200µm, scale bar in magnified images (bottom) = 50µm. C) Iso-type controls for the images in  
1 Figure S3C obtained by staining the tissue directly with Alexa fluor (AF) conjugated anti-Rabbit IgG (Rb-  
2 647) as ISO for CoV2(N) and anti-Mouse IgG (Ms-488) ISO for p63. Scale bar = 200µm. D) Iso-type  
3 controls for the images in Figure S3D. obtained by staining the tissue directly with AF conjugated  
4 antibodies; AF-anti-Goat IgG (Gt-488) ISO for ACE2, AF-anti-Rabbit IgG (Rb-546) as ISO for TMPRSS2, and  
5 AF-anti-Mouse (Ms-647) as ISO for CoV2(s). Scale bar = 200µm.

6

7



8  
9 Supplemental Figure 5

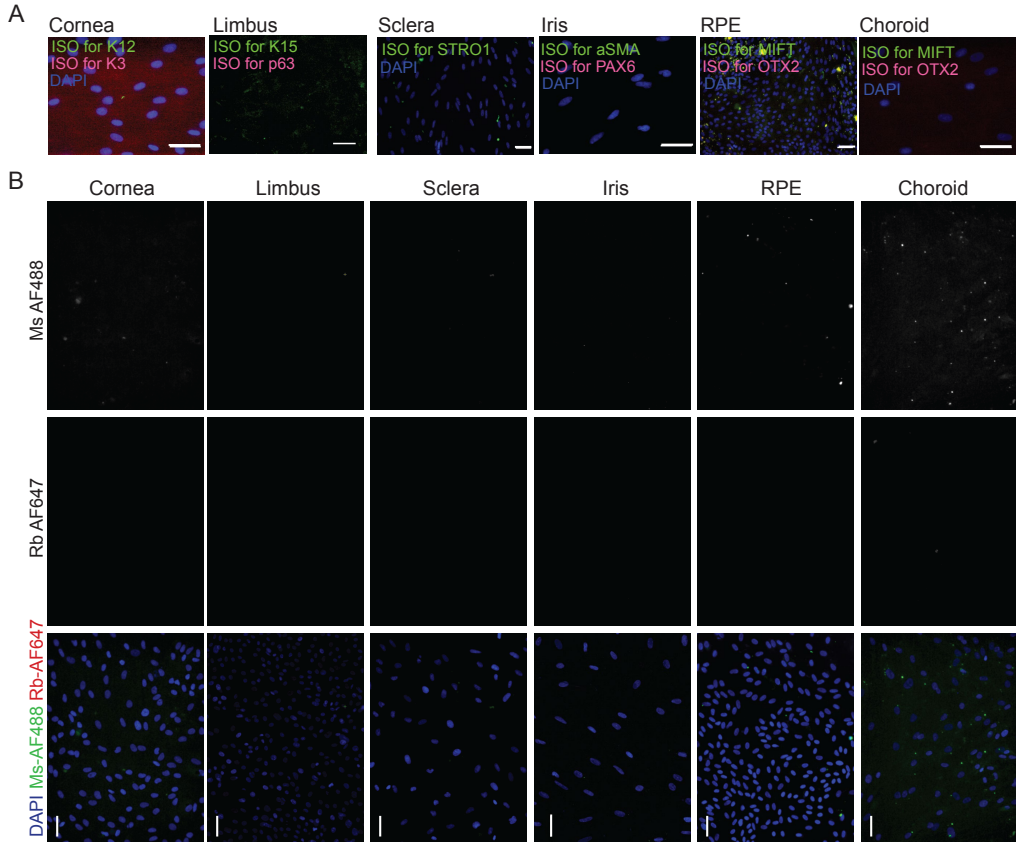

0  
1

2 **Figure S5. Isotype controls from immunofluorescence of cell-type markers for human donor cells,**  
3 **SARS-CoV-2 infected cells and quantification of IF for ACE2 and CoV2(s) in donor ocular cells,**  
4 **related to Figure 2.** A) Isotype control for cell type markers in primary cell cultures from human cadaver  
5 donor cells. Green =Ms-Alexa fluor (AF) 488 (ISO), red = Rb- AF647 (ISO), blue = DAPI, scale bar = 50µm.  
6 B) Iso-type controls for images of SARS-CoV2 and ACE-2 in primary cells cultures from human cadaver  
7 donors, scale bar=50µm. C) Quantification of ACE2 positive cells (left) and SARS-CoV2(S) positive cells  
8 (right) from IF images of postmortem donor cells infected with SARS-CoV2 at an M.O.I.=1. Images of cells  
9 were taken with fixed settings and brightness thresholds for ACE2 (red fluorescents) and SARS-CoV2(S)  
0 (green fluorescents) were set to fixed values in all images prior to counting, using Fiji software. Dots  
1 represent biological replicates and between 4 and 7 randomly picked images were counted per replica,  
2 counting  $776 \pm 687$  cells per sample (mean  $\pm$  SD), columns and error-bars show mean  $\pm$  SEM.

3

4

5 Supplemental Figure 6

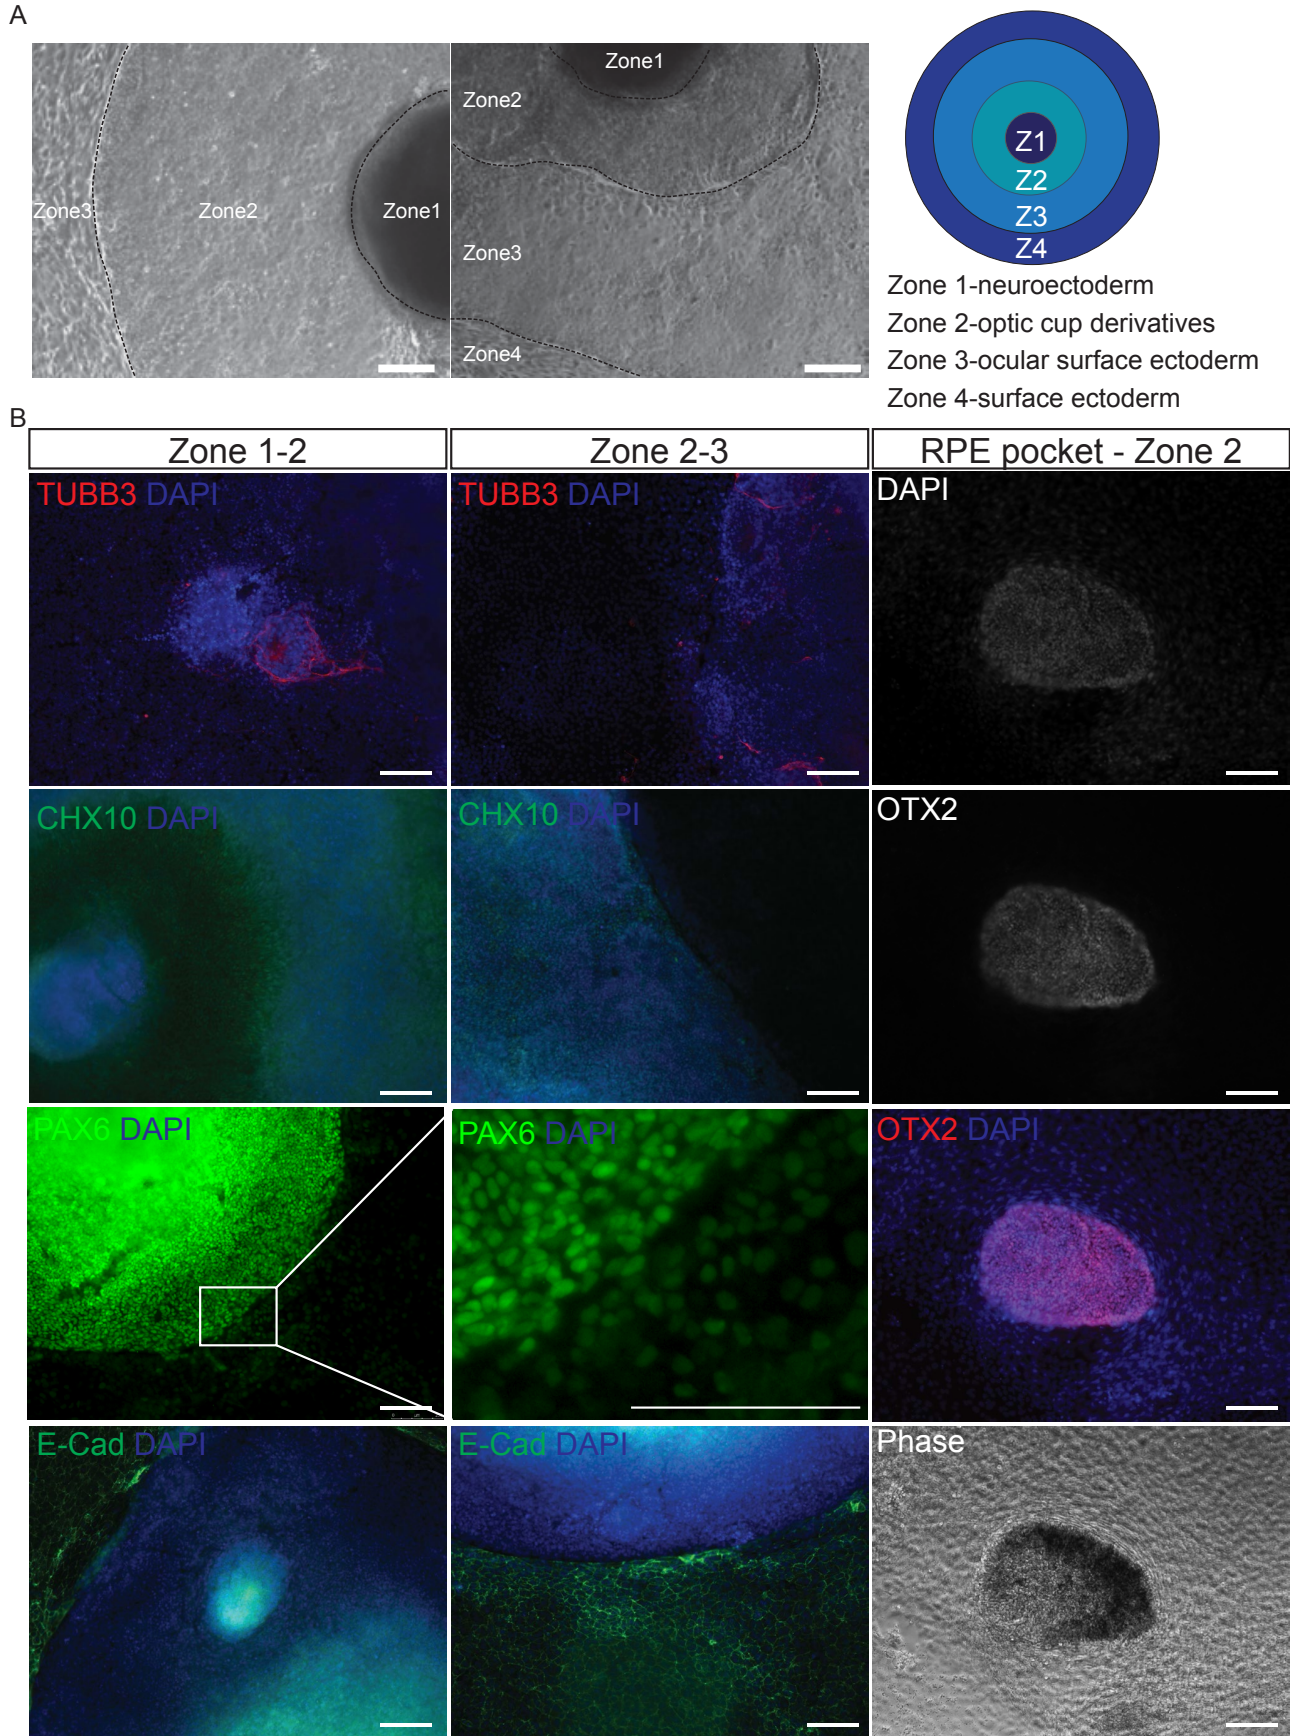

7 **Figure S6. Pluripotent stem cell derived SEAM, related to Figure 4.** A) Phase images of SEAM  
8 differentiation. B) Expression pattern of proteins marking the differentiation of the following lineage  
9 progenitors in specific SEAM zones; TUBB3 marks the neuroectoderm lineage in Zone1, CHX10 marks the  
0 neural retina progenitors in Zone 2, PAX6 marks the optic cup in Zone 2, OTX2 marks retinal pigment  
1 epithelium. E-Cad marks ocular and surface ectoderm in Zone 3 and 4, respectively. Scale bar = 100µm.

2

3



7 **Figure S7. Annotation of SEAM differentiation, related to Figure 4.** Distal optic cup (DOC), Non-  
8 melanocytic periocular mesenchyme (NM-POM), retinal pigment epithelium (RPE), Intestine (Ints),  
9 Ocular Surface Ectoderm (OCE), Macrophages (Macro), Lymphocyte (Lymph), Surface ectoderm (SrfEct),  
0 Bone Marrow (BM), Melanocytic Periocular Mesenchyme (M-POM), Neural (Neur).

1

2
